# Supplementary material
Source: Springer Nature journal article supplement (https://www.springermedizin.de/resource/supplementary/13058_2010_2871_MOESM12_ESM.pdf/9702780)

**A**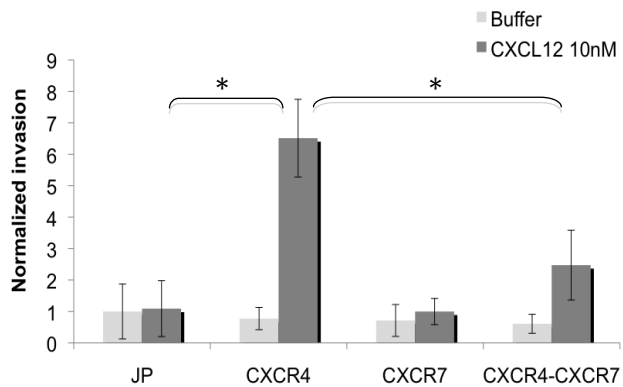**B**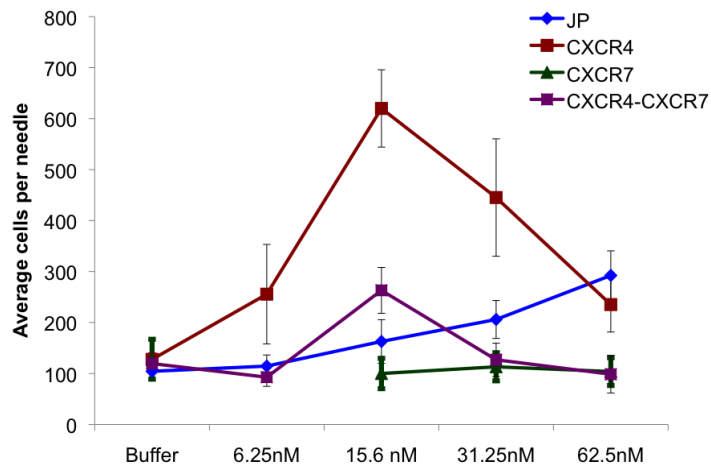**C**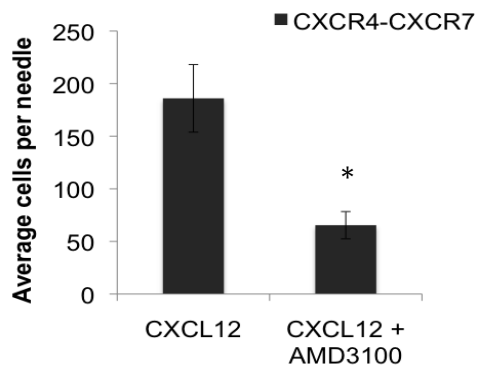**D**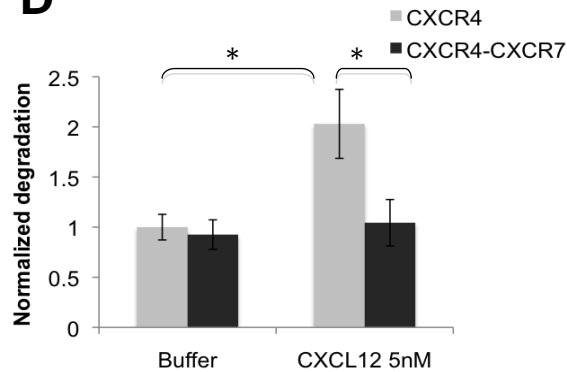

Supplement: MOESM12 [file 9702780]
